# Supplementary material for: ReXSpecies – a tool for the analysis of the evolution of gene regulation across species
Source: PubMed Central journal article supplement (PMC2346469; doi:10.1186/1471-2148-8-111), 2008-04-14

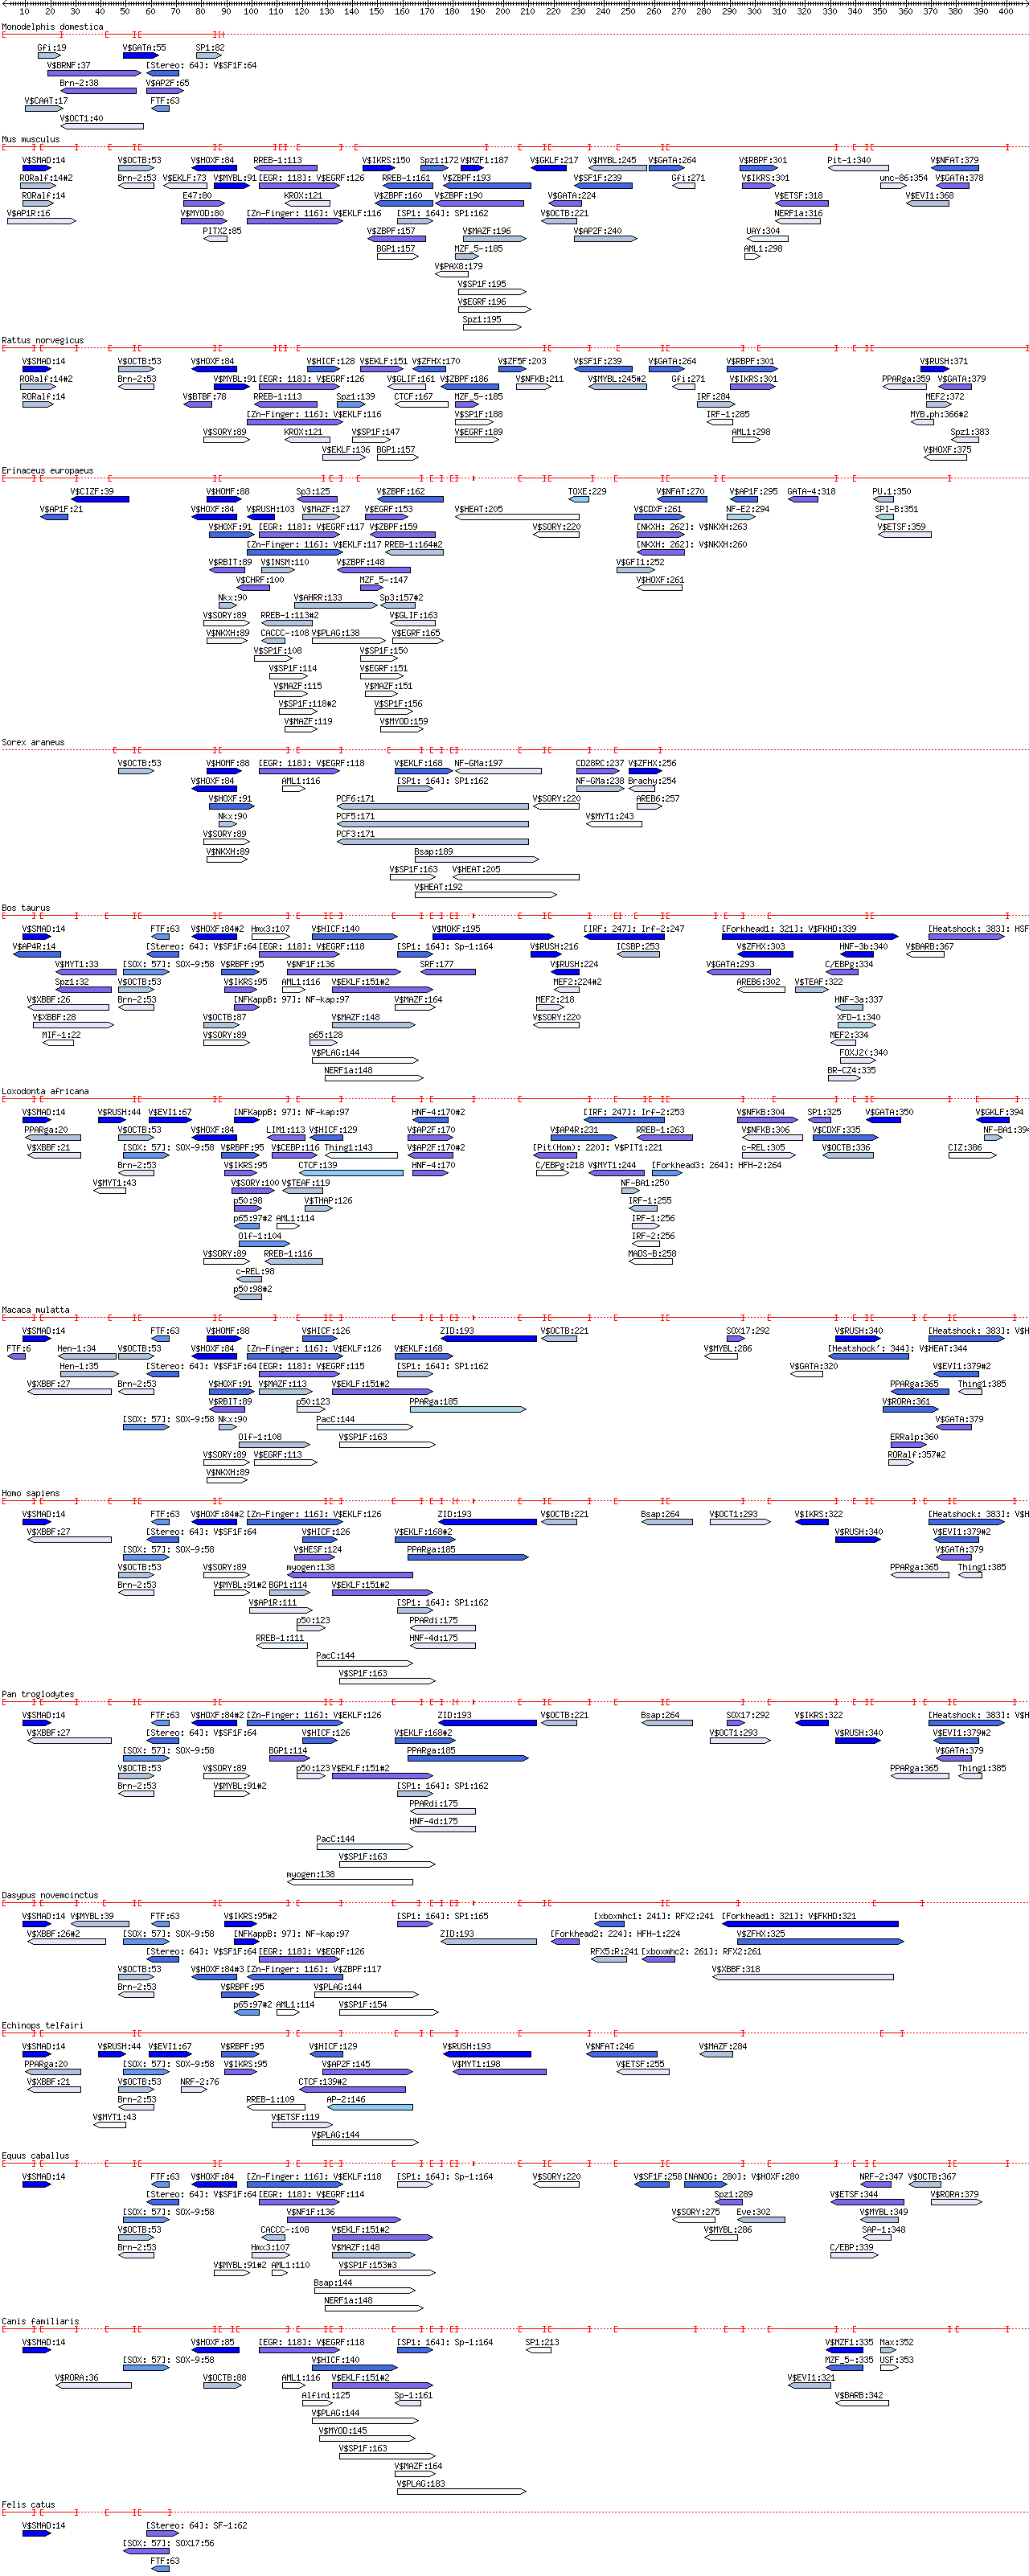

Supplement: 1471-2148-8-111-S1.pdf [file 1471-2148-8-111-S1.pdf]
